# Supplementary material for: Characterizing the Different Effects of Zika Virus Infection in Placenta and Microglia Cells
Source: MDPI journal article supplement (doi:10.3390/v10110649), 2018-11-18

**Supplementary figure 2:** Fold-induction values for each cell type at time-matched mock-infected cells after only siRNA-control transfection (UI), siRNA-control transfection plus virus infection (I), or transfected with either siRNAs targeting TLR8 or TLR7+TLR8 (upper panel), TLR7 or TLR7+TLR8 (middle panel) or STAT2 (lower panel) prior to infection with ZIKV at 1dpi and 3dpi in each of two human cell types.

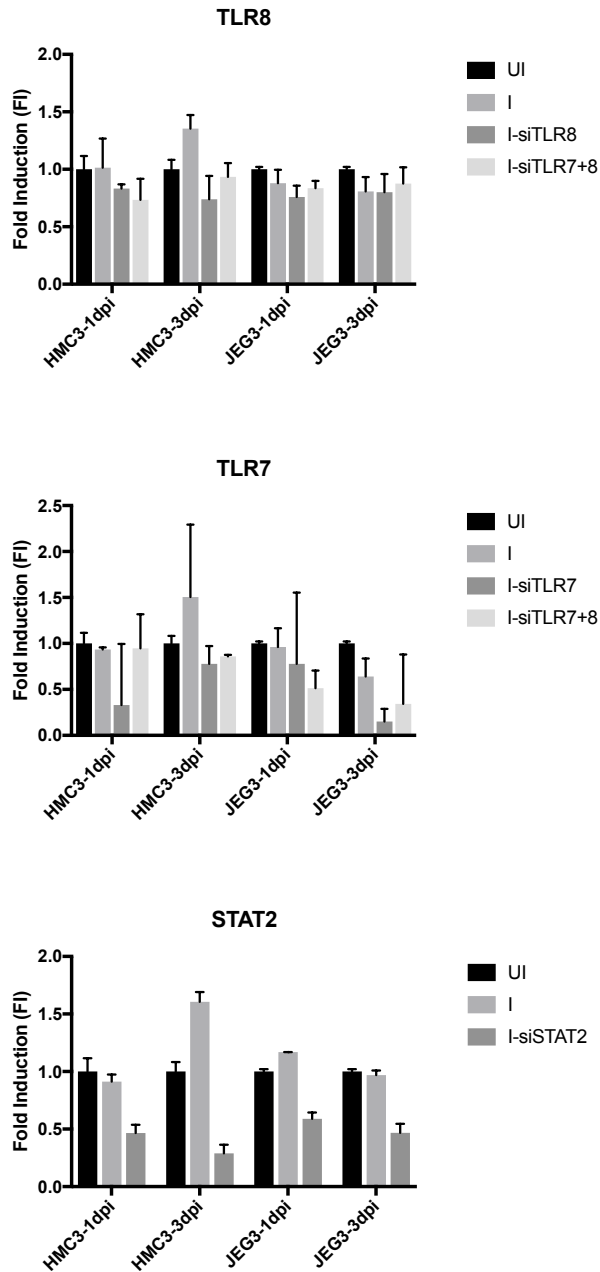

Supplement: s1 [file s1]
