# Supplementary material for: Characterizing the Different Effects of Zika Virus Infection in Placenta and Microglia Cells
Source: MDPI journal article supplement (doi:10.3390/v10110649), 2018-11-18
Supplement: s1 [file s1]

**Supplementary table 2:** Innate and Adaptive Immune Responses RT<sup>2</sup> Profiler PCR Array list of genes.

| Gene ID |
|---------|---------|---------|---------|---------|---------|
| APCS    | CD86    | IFNAR1  | IL5     | MX1     | TBX21   |
| C3      | CD8A    | IFNB1   | IL6     | MYD88   | TICAM1  |
| CASP1   | CRP     | IFNG    | CXCL8   | NFKB1   | TLR1    |
| CCL2    | CSF2    | IFNGR1  | IRAK1   | NFKBIA  | TLR2    |
| CCL5    | CXCL10  | IL10    | IRF3    | NLRP3   | TLR3    |
| CCR4    | CXCR3   | IL13    | IRF7    | NOD1    | TLR4    |
| CCR5    | DDX58   | IL17A   | ITGAM   | NOD2    | TLR5    |
| CCR6    | FASLG   | IL18    | JAK2    | RAG1    | TLR6    |
| CCR8    | FOXP3   | IL1A    | LY96    | RORC    | TLR7    |
| CD14    | GATA3   | IL1B    | LYZ     | SLC11A1 | TLR8    |
| CD4     | HLA-A   | IL1R1   | MAPK1   | STAT1   | TLR9    |
| CD40    | HLA-E   | IL2     | MAPK8   | STAT3   | TNF     |
| CD40LG  | ICAM1   | IL23A   | MBL2    | STAT4   | TRAF6   |
| CD80    | IFNA1   | IL4     | MPO     | STAT6   | TYK2    |
