# Supplementary material for: Characterizing the Different Effects of Zika Virus Infection in Placenta and Microglia Cells
Source: MDPI journal article supplement (doi:10.3390/v10110649), 2018-11-18
Supplement: s1 [file s1]

**Supplementary table 3:** Zika virus TaqMan primers and Probe for RT-qPCR.

|                       |                                 |
|-----------------------|---------------------------------|
| <b>Forward primer</b> | 5'-ATAACAGCTTTGTCGTGGATG-3'     |
| <b>Reverse primer</b> | 5'- TAACCTTGAGCCAGACACTAG-3'    |
| <b>FAM-Probe</b>      | 5'- AGAGCATGGAACAGCTTTCTTGTG-3' |
