# Supplementary material for: Characterizing the Different Effects of Zika Virus Infection in Placenta and Microglia Cells
Source: MDPI journal article supplement (doi:10.3390/v10110649), 2018-11-18

**Supplementary figure 1:** Fold-induction values of control siRNAs in untreated (UT) or positive control (PSC) samples at 1dpi and 3dpi following siRNA transfection in each HMC3 and JEG3 cells.

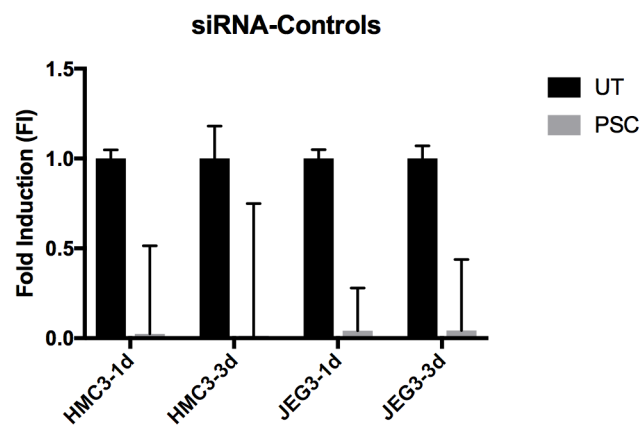

Supplement: s1 [file s1]
