# Supplementary material for: Characterizing the Different Effects of Zika Virus Infection in Placenta and Microglia Cells
Source: MDPI journal article supplement (doi:10.3390/v10110649), 2018-11-18
Supplement: s1 [file s1]

**Supplementary table 1:** set of primers used for measuring transcriptional expression levels through RT-qPCR.

| Gene    | Primer 1                      | Primer 2                      |
|---------|-------------------------------|-------------------------------|
| Actin B | 5'-CCTTGCACATGCCGGAG-3'       | 5'-ACAGAGCCTCGCCTTTG-3'       |
| 18S     | 5'-GGACATCTAAGGGCATCACAG-3'   | 5'-GAGACTCTGGCATGCTAACTAG-3'  |
| TLR7    | 5'-GGAATGTAGAGGTCTGGTTGAAG-3' | 5'-CCAGATATAGGATCACTCCATGC-3' |
| TLR8    | 5'-GATCCAGCACCTTCAGATGAG-3'   | 5'-ACTTGACCCAACTTCGATACC-3'   |
| STAT1   | 5'-GATCACTCTTTGCCACACCA-3'    | 5'-TAGAGCATGAAATCAAGAGCCT-3'  |
| STAT2   | 5'-TGAAGCGCAGTAGAAAGGTG-3'    | 5'-CTGAAGGATCTCTGGAATGATGG-3' |
| IRF3    | 5'-TCCGCTTCCTTCCGTGA-3'       | 5'-AATCCCACTCCCTTCCCA-3'      |
| IRF7    | 5'-GTGGACTGAGGGCTTG-3'        | 5'-TCAACACCTGTGACTTCATGT-3'   |
| IRF9    | 5'-CTGCCCCACTCTCCACTTG-3'     | 5'-GTTAAGCTGAGGTCGTCTGAG-3'   |
| CXCL10  | 5'-CAGTTCTAGAGAGAGGTACTCCT-3' | 5'-GACATATTCTGAGCCTACAGCA-3'  |
| IFIT1   | 5'-GCTCCAGACTATCCTTGACCT-3'   | 5'-CCACAAGACAGAATAGCCAGAT-3'  |
| MX1     | 5'-GTATCACAGAGCTGTTCTCCTG-3'  | 5'-CTCCCACTCCCTGAAATCTG-3'    |
